# Supplementary material for: Steam Explosion Conditions Highly Influence the Biogas Yield of Rice Straw
Source: MDPI journal article supplement (doi:10.3390/molecules24193492), 2019-09-26
Supplement: s1 [file s1]

## Supplementary materials

for the article

### Steam explosion conditions influence the biogas yield of rice straw highly

David Steinbach, Dominik Wüst, Simon Zielonka, Johannes Krümpel, Simon Munder, Matthias Pagel and Andrea Kruse

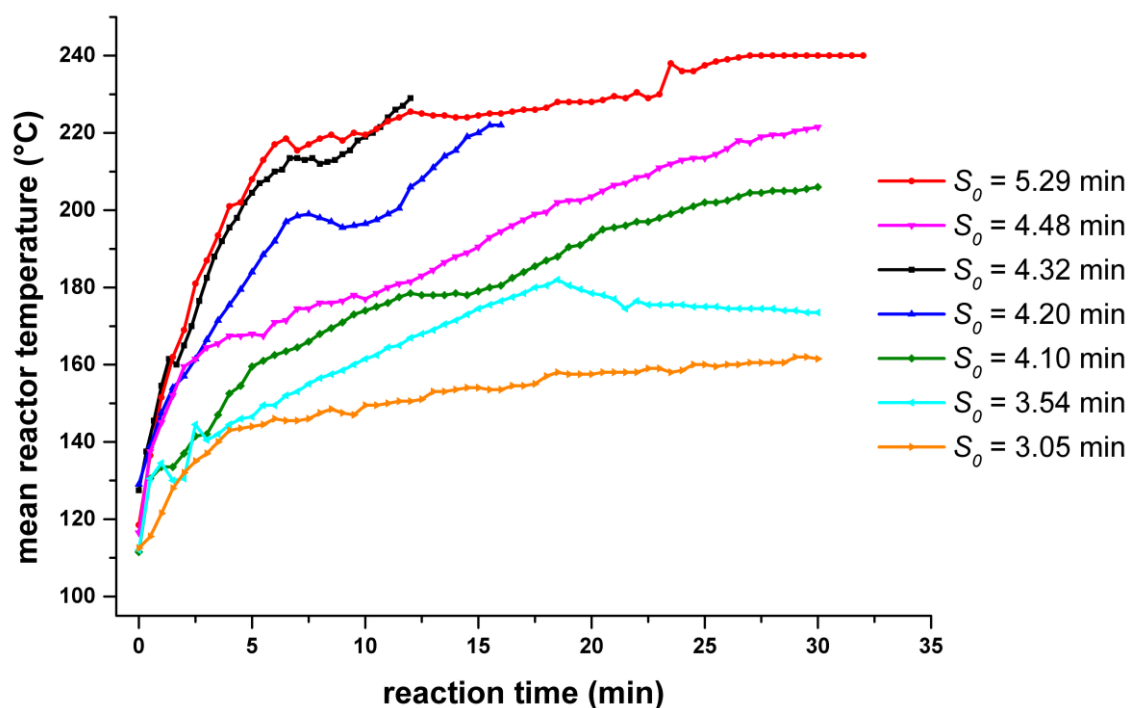

**Figure S1.** Temperature profile of steam explosion experiments which lead to different severity parameters  $S_0$ . A reaction time of zero is defined when the first steam enters the reactor. At the end of the temperature line the explosion step is performed.

**Table S1.** Photographs and SEM images of untreated rice straw and steam-exploded residue.

|                      |                                                                                     |                                                                                      |
|----------------------|-------------------------------------------------------------------------------------|--------------------------------------------------------------------------------------|
| Untreated rice straw |    |    |
| $S_0 = 3.05$ min     |   |   |
| $S_0 = 3.54$ min     |  |  |
| $S_0 = 4.10$ min     |  |  |



|                     |                                                                                     |                                                                                      |
|---------------------|-------------------------------------------------------------------------------------|--------------------------------------------------------------------------------------|
| $S_o = 4.20$<br>min |    |    |
| $S_o = 4.32$<br>min |   |   |
| $S_o = 4.48$<br>min |  |  |
| $S_o = 5.29$<br>min |  |  |
